1 **Cerebellar climbing fibers encode expected reward size**

2 Noga Larry<sup>1\*</sup>, Merav Yarkoni<sup>1\*</sup>, Adi Lixenberg<sup>1</sup> and Mati Joshua<sup>1</sup>

3 1. Edmond and Lily Safra Center for Brain Sciences, the Hebrew University, Jerusalem, Israel

4 \* These authors contributed equally.

5

6

7

8

9

10

11

12

13

14

15 Acknowledgments: We thank Y. Botschko for technical assistance. This study was supported  
16 by a HFSP career development award, the Israel Science Foundation and the European  
17 Research Council.

18

19

20 Correspondence to: Noga Larry  
21 The Edmond and Lily Safra Center for Brain Sciences  
22 The Hebrew University of Jerusalem  
23 Edmond J. Safra Campus  
24 Jerusalem 9190401  
25 Email: [noga.larry@mail.huji.ac.il](mailto:noga.larry@mail.huji.ac.il)

26 **Climbing fiber inputs to the cerebellum encode error signals that instruct learning. Recently,**  
27 **evidence has accumulated to suggest that the cerebellum is also involved in the processing**  
28 **of reward. To study how rewarding events are encoded, we recorded the activity of climbing**  
29 **fibers when monkeys were engaged in an eye movement task. At the beginning of each trial,**  
30 **the monkeys were cued to the size of the reward that would be delivered upon successful**  
31 **completion of the trial. Climbing fiber activity increased when the monkeys were presented**  
32 **with a cue indicating a large reward size. Reward size did not modulate activity at reward**  
33 **delivery or during eye movements. Comparison between climbing fiber and simple spike**  
34 **activity indicated different interactions for coding of movement and reward. These results**  
35 **indicate that climbing fibers encode the expected reward size and suggest a general role of**  
36 **the cerebellum in associative learning beyond error correction.**

## 37 **Introduction**

38 Computational, anatomical, and functional evidence support the theory that the  
39 cerebellar cortex performs error correcting supervised motor learning (Albus, 1971; Gilbert  
40 and Thach, 1977; Marr, 1969; Nguyen-Vu et al., 2013; Stone and Lisberger, 1990; Suvrathan  
41 et al., 2016). In this framework, motor learning occurs through changes in the computation of  
42 Purkinje cells, the sole output cells of the cerebellar cortex. Purkinje cells receive two distinct  
43 types of inputs: parallel fiber inputs and climbing fiber inputs. Each type of input leads to a  
44 different type of action potential. Parallel fiber inputs modulate the rate of Simple spikes  
45 (Sspks), events similar to action potentials in other cell types. Climbing fiber inputs result in  
46 complex spikes (Cspks), which are unique prolonged events. Cspks are thought to represent  
47 instructive error signals triggered by movement errors. These error signals adjust the Sspk  
48 response of the Purkinje cell to parallel fiber input, resulting in improvement in subsequent  
49 movements. This hypothesized role of the Cspks in learning was broadened when it was  
50 shown that the Cspk rate increases in response to cues that are predictive of undesired  
51 successive stimuli (Ohmae and Medina, 2015). Thus, the Cspk signal is well-suited for driving  
52 associative learning based on motor errors that drive avoidance of aversive stimuli.

53 Recent research has shown that Cspk rate increases when behavior leads to a desired  
54 rewarded outcome (Heffley et al., 2018) or when cues predict an upcoming reward  
55 (Kostadinov et al., 2019), a marked departure from their established role in error signaling.  
56 We aimed to further investigate what is coded by the reward related Cspk increase and  
57 whether the reward driven Cspk modulations are linked to simple spike modulations.

58 We considered three possibilities for the coding of reward by Cspks. The first was that  
59 the Cspk reward signal could be directly linked to the physical delivery of reward, for example.  
60 For example to reward consumption behavior (such as licking; Welsh et al., 1995) or to the  
61 signal at reward delivery that behavior was successful (Heffley et al., 2018). If so, we would  
62 expect reward related modulations of the Cspk rate to be locked to the time of reward  
63 delivery. The second possibility was that the Cspks could encode the predicted reward  
64 consequences of arbitrary stimuli, similar to the way in which Cspks encode the prediction of  
65 an undesired air-puff (Ohmae and Medina, 2015). If this were the case, we would expect a  
66 Cspk increase when reward predictive stimuli are presented. Finally, reward could modulate  
67 Cspks through the coding of motor errors. In the eye movement system, for instance, Cspks  
68 are modulated when the eye velocity does not match the target velocity (i.e. retinal slip; Stone  
69 and Lisberger, 1990). Reward could influence the representation of the error signal such that  
70 similar retinal slips would result in a higher Cspk rate when a greater reward is expected. Thus,  
71 if reward acts on error signaling directly, we would expect reward to modulate the Cspk rate  
72 at the time of the retinal slip.

73 To dissociate these alternatives we designed a task that temporally separated reward  
74 information, motor behavior and reward delivery (Joshua and Lisberger, 2012). We found that  
75 climbing fiber activity encoded the expected reward size seconds before the reward delivery.  
76 Reward size did not modulate activity at reward delivery. Furthermore, reward expectation  
77 did not modulate the Cspk tuning of eye movement parameters. These results suggest the  
78 Cspk reward signal encodes changes in the prediction of future reward. During the cue, the  
79 modulation in the Cspk and Sspk rates of cells were uncorrelated, in contrast to the negative

80 correlation reported in the context of error correction learning (Gilbert and Thach, 1977;  
81 Ohmae and Medina, 2015) or the coding of movement parameters (Ojakangas and Ebner,  
82 1994; Stone and Lisberger, 1990). This suggests that Cspk modulation of the Sspk rate could  
83 be restricted to certain network states. Overall our findings imply that the cerebellum receives  
84 signals that could allow it to perform both error and reward-based associative learning, thus  
85 going beyond the accepted role of the cerebellum in error correction to suggest a general role  
86 in associative learning.

## 87 **Results**

### 88 *Complex spikes encode the size of the expected reward*

89 Monkeys performed a smooth pursuit eye movement task in which we manipulated  
90 the expected reward size (Joshua and Lisberger, 2012; Figure 1A). At the start of each trial,  
91 the monkey fixated on a white spot. The spot then changed to one of two colors, indicating  
92 whether a large or small reward would be given upon successful completion of the trial. After  
93 a variable delay, the colored target began to move in one of eight directions and the monkey  
94 had to accurately track it. At the end of a successful trial, the monkey received either a large  
95 or a small reward, as indicated by the color of the cue. To suppress catch-up saccades in the  
96 time immediately after the onset of the target movement, the movement of the target was  
97 preceded by an instantaneous step in the opposite direction (step-ramp). Thus, when the  
98 monkey began tracking, the target was close to the eye position and there was no need for  
99 fast corrective eye movements (Rashbass and Westheimer, 1961).

100 The average eye velocity during tracking of the large reward target was faster and  
101 more similar to the target velocity than the tracking of the small reward target (Figure 1B).  
102 This difference was clearly apparent even at the single session level. In most sessions, the  
103 average eye velocity of 250 ms following motion onset was larger when the expected reward  
104 was large (Figure 1C). This behavioral difference and the selection of the larger reward target  
105 in an additional choice task (Figure 1-figure supplement 1) indicate that the monkeys  
106 associated the reward size with the color of the target. During the task, we recorded neural  
107 activity from the flocculus complex and neighboring areas (Figure 1-figure supplement 2). Our  
108 recordings included neurons that responded to eye movements and neurons that did not. Our  
109 task design allowed us to separately analyze the Cspk rate following cue presentation, during  
110 pursuit, and following reward delivery.

111 Following cue presentation, we found that many Purkinje cells (40 out of 220) had  
112 different Cspk rates in the different reward conditions. Of these, the vast majority (34 cells)  
113 transiently increased their Cspk rate when the expected reward was large but not when the  
114 expected reward was small (example in Figure 2A-C). This difference was apparent when  
115 examining the population average Cspk peri-stimulus time histogram (PSTH). After the color  
116 cue appeared, the population average Cspk rate was higher when the expected reward was  
117 large, as can be seen by the difference in the PSTHs of the two reward conditions (Figure 2D).  
118 At the single cell level, most cells had a higher Cspk rate on large reward trials than on small  
119 reward trials (Figure 2E, most dots lie beneath the identity line). Thus, the Cspk rate was  
120 modulated by changes in reward expectation, at times temporally distinct from the behavioral  
121 effect on pursuit eye movements and reward delivery. This change of rate reflects mostly an

122 increase in the number of trials with a single Cspk following the cue, and a minor increase in  
123 the number of trials with multiple Cspks (Figure 2C, F and Figure 2-figure supplement 1).

124 *Complex spikes do not encode reward size at reward delivery*

125 The population Cspk rate was only affected by reward size when information  
126 regarding future reward was given, but not during the reward itself. During reward delivery,  
127 the PSTHs of the two conditions overlapped (Figure 3A), indicating a similar population  
128 response for the large and small rewards. When examining the responses of single cells, the  
129 Cspk rate was similar in the two reward conditions (Figure 3B, most cells fell close to the  
130 identity line). To compare the temporal pattern of the reward size encoding at cue and reward  
131 delivery, we calculated the difference in PSTHs between the large and small reward conditions  
132 (Figure 3C). The difference between large and small rewards rose steeply shortly after the  
133 color cue appeared. In sharp contrast, following reward delivery, there was only a small rate  
134 fluctuation that resembled the fluctuation prior to reward delivery. At the single cell level,  
135 there was no correlation between cell encoding of reward size during the cue and during  
136 reward delivery. For both the full population and for the subpopulation of neurons  
137 significantly coding the reward size at cue, the correlation between cue and reward delivery  
138 epochs was not significant (Figure 3D). This indicates that Purkinje cells that differentiated  
139 reward conditions during the cue did not differentiate between them during delivery.

140 We ruled out the possibility that differences in licking behavior were responsible for  
141 the Cspk rate modulations. The pattern of licking (Figure 3E,F) and Cspk rate was completely  
142 different. Licking but not spiking increased at reward delivery. Further, after cue onset, licking  
143 in both reward conditions decreased whereas the temporal pattern of Cspks was different  
144 between reward conditions (Figure 2D). In approximately half of the recording sessions, we  
145 recorded licking behavior along with our electrophysiological recordings. For the cells that  
146 discriminated between reward conditions in these sessions (n=21), the population PSTH  
147 showed a difference between reward conditions both in trials that included a lick immediately  
148 following the cue and trials that did not (Figure 3-figure supplement 1A,B). We also  
149 approximated the contribution of licking to the Cspk rate (Figure 3-figure supplement 1C,D).  
150 This contribution was negligible and was not different for large and small rewards.

151 We conducted a similar analysis for saccades and microsaccades. The pattern of  
152 saccades and microsaccades also differed from the Cspk pattern (Figure 3-figure supplement  
153 2A,B). Saccades but not spiking increased following reward. After cue presentation, fixational  
154 saccades were modulated by reward (Joshua et al., 2015), but this modulation did not affect  
155 the Cspk response to the cue (Figure 3-figure supplement 2C,D). The cells that discriminated  
156 between the large and small rewards after cue presentation responded similarly in trials with  
157 and without saccades. Similar to licking, the approximated contribution of saccades to the  
158 Cspk rate was small and did not differ between reward conditions (Figure 3-figure supplement  
159 2E,F). We also ruled out the possibility that differences in saccade velocity or direction could  
160 explain our results (not shown).

161 *Complex spike coding of target motion does not depend on reward size*

162 Overall, these results indicate that Cspk rate differentiates between reward sizes  
163 when reward information is first made available, but not during delivery. However, Cspks are  
164 also tuned to the direction of target motion (Kobayashi et al., 1998; Stone and Lisberger,  
165 1990). Our sample contained cells that were directionally tuned and were not cue responsive  
166 (21 cells, example in Figure 4-figure supplement 1A-C), cells that were cue responsive but  
167 were not directionally tuned (28 cells, example in Figure 4-figure supplement 1D-F) and cells  
168 that were both (12 cells, example in Figure 4-figure supplement 1G-I).

169 To determine how Cspk coding of target direction is affected by reward expectation,  
170 we focused on directionally tuned cells (33 cells, Figure 4A,B). When we examined the Cspk  
171 rate in the preferred direction (PD) of the cell and the direction 180° to it (the null direction),  
172 we did not find significant differences in the Cspk rate between reward conditions (Figure 4C).  
173 We aligned the cells to their PD and calculated a population tuning curve for each reward  
174 condition. The tuning curves overlapped and were not significantly different (Figure 4D).

175 We also examined the modulation of reward on Cspk rate at different eye velocities.  
176 We performed an additional speed task in which we manipulated the target speed (5, 10 or  
177 20°/s). Eye velocity corresponded to the speed of the target (Figure 5A). The effect of  
178 expected reward size on eye velocity was evident for all speeds at the average and the single  
179 session level (Figure 5A,B). Whereas cells responded to the target movement onset (Figure  
180 5C), reward expectation did not modulate their response (Figure 5D). Together with the  
181 directional tuning results, this shows that encoding of reward is limited to the time point at  
182 which the reward size is first signaled and not the time when reward drives changes in  
183 behavior. Note that the rate of the Cspks did not increase monotonically with target speed  
184 (Figure 5C and D); we return to this point in the discussion.

#### 185 *The relationship between simple and complex spikes is different for reward and direction* 186 *tuning*

187 Given that Cspk were modulated by reward size following cue presentation, we went  
188 on to examine the Sspk modulations that occur concurrently. Preparatory activity following  
189 cues that predict reward or movement had been found in the cerebellum both at the level of  
190 the inputs that modulate Sspk rate (Wagner et al., 2017) and at the level of their output  
191 (Chabrol et al., 2019; Gao et al., 2018). Recently it was shown that Sspk rate decreases when  
192 behavior leads to a reward (Chabrol et al., 2019). Within the cells we recorded, Sspk responses  
193 to cue presentation were heterogeneous (Figure 6, examples in A-C). We found some cells  
194 that elevated their Sspk rate in the large versus small reward conditions (Figure 6A), others  
195 where activity was lower in the large reward condition (Figure 6B) and cells in which responses  
196 were similar in the large and small reward conditions (Figure 6C). Overall, we found more cells  
197 in which the Sspk rate was larger for the large reward condition (Figure 6D, blue line).  
198 However, in a substantial number of cells the Sspk rate was larger for the small reward (Figure  
199 6D, red line). As a result of the opposite modulation, at the population level, the difference in  
200 Sspk between large and small reward mostly averaged out (Figure 6E,F).

201 The directionally tuned Cspk signal has been linked to the coding of visual errors that  
202 instruct motor learning (Medina and Lisberger, 2008; Nguyen-Vu et al., 2013) by changing the  
203 Sspk response to parallel fiber inputs. Cspks generate plasticity in parallel fiber synapses

204 leading to a decrease in the Sspk rate (Ekerot and Kano, 1985). This plasticity is thought to  
205 underlie the opposite modulations of simple and Cspk rates on different tasks (Badura et al.,  
206 2013; Gilbert and Thach, 1977; Stone and Lisberger, 1990). The consistently larger response  
207 to the larger reward in the Cspk (Figure 2) versus the heterogeneous Sspk response (Figure 6),  
208 suggests that the expected opposite modulation between Cspk and Sspk found in relation to  
209 movement does not hold for reward related modulations.

210 To test the relationship between Cspk and Sspk directly we compared the rate  
211 modulation in the same cell. In our sample of cells, we found the expected opposite  
212 modulations during movement. When we aligned the Cspk tuning curve to the preferred  
213 direction of the Sspks of the same cell, we found that the Cspk rate decreased in directions  
214 for which the Sspk rate increased (Figure 7A). To examine whether this effect existed at the  
215 single cell level, we calculated the signal correlation for the complex and Sspks which we  
216 defined as the correlation between simple and complex direction tuning curves. We found  
217 that most signal correlations were negative; in other words, the Cspks and Sspks were  
218 oppositely modulated during movement in most cells (Figure 7B). This effect disappeared  
219 when we shuffled the phase of the Cspk tuning curve or assigned direction labels randomly  
220 (see Methods).

221 Unlike movement related modulation, the complex and simple spikes were not  
222 oppositely modulated following cue presentation (Figure 7C,D). If reward-related modulations  
223 in Cspks drive Sspk attenuation, we would expect that the higher Cspk rate in the large reward  
224 condition would result in a stronger attenuation of Sspks. This would lead to a negative  
225 correlation between the complex and simple spike reward modulations during the cue.  
226 However, we found that simple and complex spike modulations following cue presentation  
227 were uncorrelated (Figure 7C). As we observed cells that changed their Sspk rate after the cue  
228 without differentiating between reward conditions, we also calculated the correlation  
229 between Cspk reward condition modulations and the change in Sspk rate following the cue.  
230 In this case as well, we did not find any correlation (Figure 7D). Further, the correlations were  
231 not significantly different from zero whether we analyzed the full population or only those  
232 cells whose Cspks were significantly tuned to reward size during the cue. Thus, the way the  
233 difference in Cspk rate during cue affects Sspk encoding and behavior may differ from the one  
234 suggested by the error signal model.

## 235 ***Discussion***

236 The difference in Cspk rate during cue presentation and the lack of difference during  
237 reward delivery and pursuit behavior implies that Cspks can act as a reward prediction signal.  
238 This finding diverges from the accepted error signal model. The coding of predictive stimuli  
239 has been reported in Cspks in the context of error-based learning (Ohmae and Medina, 2015).  
240 Together with the current results, this suggests a more general role for the cerebellum in  
241 associative learning, when learning is both error and reward-based (Heffley and Hull, 2019;  
242 Kostadinov et al., 2019; Thoma et al., 2008; Wagner et al., 2017).

## 243 ***Plasticity and learning from rewards in the cerebellum***

244 Error-based models of the cerebellum link the cerebellar representation of

245 movement, plasticity mechanisms and learning. In this framework, the behavioral command  
246 of the cerebellar cortex in response to a stimulus is represented by the Sspk rate of Purkinje  
247 cells. Cspks lead to a reduction in the synaptic weight in recently active parallel fibers and  
248 thereby change the Sspk rate in response to similar parallel fiber input (Ekerot and Kano,  
249 1985). This change in the Sspk rate is hypothesized to alter the behavioral response to the  
250 same stimulus. Thus, when errors occur, the behavior that led to them is eliminated. The same  
251 logic cannot apply to learning from rewards since reward strengthens rather than eliminates  
252 the behavior that led to the reward (Thorndike, 1898).

253 Consistent with this reasoning, we found that reward-related modulation of Cspks did  
254 not exhibit the classical decrease in Sspk activity associated with Cspk activity (Figure 7). This  
255 result suggests that on our task, other plasticity rules might mask or override the depression.  
256 Research on the cerebellum has identified many other sites in which plasticity might drive  
257 changes in neuronal activity (Gao et al., 2012; Jörntell and Ekerot, 2002). Furthermore, the  
258 Cspk dependent plasticity in the parallel fibers might also change sign as a result of the  
259 network state (Rowan et al., 2018). Thus, our results suggest that such mechanisms are  
260 engaged when Cspks are modulated by reward.

261 The Cspk reward signal does not seem to affect cerebellar computation through the  
262 same relatively well-understood mechanisms of the Cspk error signal. We also did not find an  
263 effect of reward on the Cspk signal during behavior. Thus, the influence of the Cspk reward  
264 signal to behavior remains unclear. Moving beyond the level of representation to a  
265 mechanistic understanding of the effect of the Cspk reward signal on cerebellar computation  
266 and behavior is a crucial next step.

#### 267 *Relationship to previous studies of the smooth pursuit system*

268 A further demonstration of the existence of independent mechanisms for learning  
269 from reward and sensory errors emerges when combining the current results with our recent  
270 behavioral study (Joshua and Lisberger, 2012). In that study, monkeys learned to predict a  
271 change in the direction of target motion by generating predictive pursuit movements. The size  
272 of the reward did not modulate the learning process itself but only the execution of the  
273 movement (Joshua and Lisberger, 2012). The critical signal for direction change learning has  
274 been shown to be the directionally tuned Cspk signal (Medina and Lisberger, 2008). Our  
275 findings that the target direction signal is not modulated by reward provides a plausible  
276 explanation at the implementation level for this behavioral finding. The directionally tuned  
277 Cspks that drive learning are not modulated by reward; therefore, learning itself is reward  
278 independent.

279 In the current study, the Cspk rate did not increase with target speed (Figure 5). At  
280 least one study has reported a monotonic increase between Cspk rate and motion speed  
281 (Kobayashi et al., 1998). The specific experimental protocol we used might have led to the lack  
282 of speed coding. The vast majority of trials in which the monkeys were engaged were at 20  
283 °/s, and we only measured responses at different speeds in a minority of the sessions (see  
284 Methods). Therefore, it is possible that the monkey developed a speed prior (Darlington et al.,  
285 2018) and hence was expecting the target to move at 20 °/s. Violation of this prior in the  
286 slower motion trials might have potentiated the response and masked the speed tuning.



287 Behavioral support for such a prior comes from the eye speed response to low speed targets  
288 (5°/s) in which the eye speed overshoot the target speed (Figure 5A,B). Other possibilities such  
289 as the recorded population or the properties of the visual stimuli might also have contributed  
290 to the lack of speed tuning.

### 291 Future directions

292 The reward signal we found is similar to reward expectation signals in dopaminergic  
293 neurons of the ventral tegmental area (VTA) and substantia nigra pars compacta (Schultz et  
294 al., 1997). The VTA projects to the inferior olive (Fallon et al., 1984) and recently, direct  
295 projections from the cerebellum to dopaminergic neurons in the VTA have been found (Carta  
296 et al., 2019). Reward signals have also been found in cerebellar granular cells that modulate  
297 the Sspk rate in Purkinje cells (Wagner et al., 2017) and in the deep cerebellar nuclei (Chabrol  
298 et al., 2019). Researching the differences and interactions of reward signals is an important  
299 next step in understanding how reward is processed. In particular, future research will need  
300 to investigate the source of the reward information in the inferior olive.

301 Another interesting question is whether the Cspk representation of reward depends  
302 on the range of possible rewards. Our results demonstrate that the Cspk rate is informative of  
303 future reward size. Expected reward size might be represented in the cerebellum in an  
304 absolute manner, based on its physical size, or in relative order, based on its motivational  
305 value in comparison to other available rewards (Cromwell et al., 2005; Tremblay and Schultz,  
306 1999). Our results show that when a small reward cue is presented, there is no increase in the  
307 Cspk rate (Figure 2D). Although this cue predicts a future reward, it does not elicit a Cspk  
308 response. This hints that the Cspk representation may be relative and not absolute. To further  
309 verify this, we need to construct a task in which we examine the same reward size in different  
310 contexts.

### 311 Conclusion

312 To sum up, the current study demonstrates that a population of Purkinje cells receive  
313 a reward predictive signal from the climbing fibers. Our results show that the reward signal is  
314 not limited to the direct rewarding consequences of the behavior. These results thus suggest  
315 that the cerebellum receives information about future reward size. Our results go beyond  
316 previous findings of cerebellar involvement in the elimination of undesired behavior, to  
317 suggest that the cerebellum receives the relevant information that could allow it to adjust  
318 behavior to maximize reward.

319

## 320 **Methods**

321 We collected neural and behavioral data from two male *Macaca Fascicularis* monkeys  
322 (4-5 kg). All procedures were approved in advance by the Institutional Animal Care and Use  
323 Committees of the Hebrew University of Jerusalem and were in strict compliance with the  
324 National Institutes of Health Guide for the Care and Use of Laboratory Animals. We first  
325 implanted head holders to restrain the monkeys' heads in the experiments. After the monkeys  
326 had recovered from surgery, they were trained to sit calmly in a primate chair (Crist  
327 Instruments) and consume liquid food rewards (baby food mixed with water and infant  
328 formula) from a tube set in front of them. We trained the monkeys to track spots of light that  
329 moved across a video monitor placed in front of them.

330 Visual stimuli were displayed on a monitor 45 cm from the monkeys' eyes. The stimuli  
331 appeared on dark background in a dimly lit room. A computer performed all real-time  
332 operations and controlled the sequences of target motions. The position of the eye was  
333 measured with a high temporal resolution camera (1 kHz, Eye link - SR research) and collected  
334 for further analysis. Monkeys received a reward when tracking the target successfully.

335 In subsequent surgery, we placed a recording cylinder stereotaxically over the  
336 floccular complex. The center of the cylinder was placed above the skull targeted at 0 mm  
337 anterior and 11 mm lateral to the stereotaxic zero. We placed the cylinder with a backward  
338 angle of 20° and 26° for monkey B and C respectively. Quartz-insulated tungsten electrodes  
339 (impedance of 1-2 Mohm) were lowered into the floccular complex and neighboring areas to  
340 record simple and complex spikes using a Mini-Matrix System (Thomas Recording GmbH).  
341 When lowering the electrodes, we searched for neurons that responded during pursuit eye  
342 movements (see direction task) but often collected data from neurons that did not respond  
343 to eye movements. Overall, we recorded complex spikes from 148 and 72 neurons from  
344 monkeys B and C respectively. Of these, the Sspks of 28 and 19 neurons from monkeys B and  
345 C were directionally tuned during the direction task (Kruskal-Wallis test,  $\alpha=0.05$ ).

346 Signals were digitized at a sampling rate of 40 kHz (OmniPlex, Plexon). For the detailed  
347 data analysis, we sorted spikes offline (Plexon). For sorting, we used principal component  
348 analysis and corrected manually for errors. In some of the cells the Cspks had distinct low  
349 frequency components (Warnaar et al., 2015; Zur and Joshua, 2019; e.g. Figure 1-figure  
350 supplement 2B, left column and Figure 2-figure supplement 1). In these cells, we used low  
351 frequency features to identify and sort the complex spikes. We paid special attention to the  
352 isolation of spikes from single neurons. We visually inspected the waveforms in the principal  
353 component space and only included neurons for further analysis when they formed distinct  
354 clusters. Sorted spikes were converted into timestamps with a time resolution of 1 ms and  
355 were inspected again visually to check for instability and obvious sorting errors.

356 We used eye velocity and acceleration thresholds to detect saccades automatically  
357 and then verified the automatic detection by visual inspection of the traces. The velocity and  
358 acceleration signals were obtained by digitally differentiating the position signal after we  
359 smoothed it with a Gaussian filter with a standard deviation of 5 ms. Saccades were defined  
360 as an eye acceleration exceeding 1000 °/s<sup>2</sup>, an eye velocity crossing 15 °/s during fixation or  
361 eye velocity crossing 50 °/s while the target moved. To calculate the average of the smooth

362 pursuit initiation we first removed the saccades and treated them as missing data. We then  
363 averaged the traces with respect to the target movement direction. Finally, we smoothed the  
364 traces using a Gaussian filter with a standard deviation of 5 ms. We also recorded licking  
365 behavior to control for behavioral differences between reward conditions that might  
366 confound our results. Licks were recorded using an infra-red beam. Monkey B tended not to  
367 extend its tongue, therefore we recorded lip movements.

### 368 Experimental design

369 **Direction Task:** Each trial started with a bright white target that appeared in the  
370 center of the screen (Figure 1A). After 500 ms of presentation, in which the monkey was  
371 required to acquire fixation, a colored target replaced the fixation target. The color of the  
372 target signaled the size of the reward the monkey would receive if it tracked the target. For  
373 monkey B we used blue to signal a large reward (~0.2ml) and red to signal a small reward  
374 (~0.05ml); for monkey C we used yellow to signal a large reward and green to signal a small  
375 reward. After a variable delay of 800-1200 ms, the targets stepped in one of eight directions  
376 (0°, 45°, 90°, 135°, 180°, 225°, 270°, 315°) and then moved in the direction 180° from it (step-  
377 ramp, Rashbass and Westheimer, 1961). For both monkeys, we used a target motion of 20 °/s  
378 and a step to a position 4° from the center of the screen. The target moved for 750 ms and  
379 then stopped and stayed still for an additional 500-700 ms. When the eye was within a 3x3  
380 degree window around the target the monkey received a juice reward.

381 **Speed Task:** During the direction task we online fitted a Sspk tuning curve for each  
382 cell and approximated the cell's PD. If a cell seemed directionally tuned, we ran an additional  
383 speed task. The temporal structure of the speed task was the same as the direction task. The  
384 step size was set to minimize saccades and was 1°, 2° and 4° for a target speed of 5, 10 or  
385 20°/s. The targets could move either in the approximate PD of the cell or the direction 180°  
386 from it, which we termed the null direction. The targets moved at 5, 10 or 20°/s.

387 **Choice Task:** Monkeys were required to choose one of two targets (large or small  
388 reward) presented on the screen (Figure 1-figure supplement 1A). We used this task to  
389 determine whether the monkeys correctly associated the color of the target and the reward  
390 size (Figure 1-figure supplement 1B). Their choice determined the amount of reward they  
391 received. Each trial began with a 500 ms fixation period, similar to the tasks described  
392 previously. Then two additional colored spots appeared at a location eccentric to the fixation  
393 target. One of the colored targets appeared 4° below or above the fixation target (vertical  
394 axis) and the other appeared 4° to the right or left of the fixation target (horizontal axis). The  
395 monkey was required to continue fixating on the fixation target in the middle of the screen.  
396 After a variable delay of 800-1200 ms, the white target disappeared, and the colored targets  
397 started to move towards the center of the screen (vertically or horizontally) at a constant  
398 velocity of 20°/s. The monkey typically initiated pursuit eye movement that was often biased  
399 towards one of the targets (Figure 1-figure supplement 1C). After a variable delay, the  
400 monkeys typically made saccades towards one of the targets. We defined these saccades as  
401 an eye velocity that exceeded 80°/s. The target that was closer to the endpoint of the saccade  
402 remained in motion for up to 750 ms and the more distant target disappeared. The monkey  
403 was required to track the target until the end of the trial and then received a liquid food

404 reward as a function of the color of the target.

405 Data analysis

406 All analyses were performed using Matlab (Mathworks). When comparing reward  
407 conditions, we only included cells that were recorded for a minimum of 20 trials  
408 (approximately 10 for each condition). When performing analyses that included additional  
409 variables such as target direction or velocity, we set a minimum of 50 trials (approximately 3-  
410 4 for each condition).

411 To study the time varying properties of the response, we calculated the PSTH at a 1  
412 ms resolution. We then smoothed the PSTH with a 10 ms standard deviation Gaussian  
413 window, removing at least 100 ms before and after the displayed time interval to avoid edge  
414 effects. Note that this procedure is practically the same as measuring the spike count per trial  
415 in larger time bins. We defined cells that responded significantly differently to reward  
416 conditions during the cue using the rank-sum test on the mean number of spikes 100-300 ms  
417 after cue onset.

418 To calculate the tuning curves, we averaged the responses in the first 100-300 ms of  
419 the movement. We calculated the preferred direction of the neuron as the direction that was  
420 closest to the vector average of the responses across directions (direction of the center of  
421 mass). We used the preferred direction to calculate the population tuning curve by aligning  
422 all the responses to the preferred direction. We defined a cell as directionally tuned if a one-  
423 way Kruskal-Wallis test (the case of 8 directions, directions task), or a rank-sum test (the case  
424 of two directions, speed task), revealed a significant effect for direction. We present reward  
425 modulation on movement parameters only for directionally tuned cells and also confirmed  
426 that if we took the full population there was no reward modulation at motion onset (Signed-  
427 rank: Monkey B,  $P=0.8904$ ,  $n=148$ ; Monkey C,  $P=0.4487$ ,  $n=72$ ).

428 To statistically test the significance of the effect of reward direction tuning we used a  
429 permutation test. We first calculated separate tuning curves for each cell in the two reward  
430 conditions. We then chose a random subset of combinations of cells and directions and  
431 reversed the small and large reward labels of this subset. We then calculated the population  
432 PSTHs for the shuffled "small" and "large" reward conditions. Our statistic was the mean  
433 square distance of the two tuning curves. We used the percentile of the statistic of the  
434 unshuffled data to calculate the p-value. We used a similar test for the speed task in which  
435 the subset we chose was a random combination of cell, direction and speed.

436 We calculated the fraction of cells whose Sspk rate was different between reward  
437 conditions as a function of time (Figure 6F) by using left and right-tailed rank-sum tests on a  
438 moving time window. For each cell, we looked for time points in which there were significantly  
439 more Sspks in the large reward trials in comparison to the small (RL>RS) and time points in  
440 which there were significantly more Sspks in the small reward trials in comparison to the large  
441 (RS>RL). We tested each time point by calculating the number of Sspks in each trial in time  
442 bins of 200 ms surrounding it. We then tested if the number of Sspks in large reward trials was  
443 significantly different using both left and right signed-rank test. We classified that time point  
444 as RL>RS, RS>RL or neither according to the result of the tests. We then calculated the fraction

445 of cells in each category for every time point.

446 We calculated the signal correlation of each cell's Cspks and Sspks by calculating a  
447 tuning curve of each spike type and computing the Pearson correlation of the tuning curves  
448 (Figure 7B). As a control, we performed the same analysis on shuffled data. In the phase  
449 shuffled control, we shuffled the Cspk tuning curves by different phases while preserving their  
450 relative order. For example, shuffling by a phase of  $45^\circ$  meant moving the response at  $0^\circ$  to  
451  $45^\circ$ ,  $45^\circ$  to  $90^\circ$ ,  $315^\circ$  to  $0^\circ$  and so on. In the direction shuffle, we assigned random direction  
452 labels to the Cspk responses.

453 We calculated the cross-correlation of complex and Sspks (Figure 1-figure supplement  
454 2D) by calculating the PSTH of Sspks aligned to a Cspk event. We removed Cspks that occurred  
455 less than 100 ms after the trial began or less than 100 ms before a trial ended since we did  
456 not have sufficient information to calculate the PSTH. We manually removed spikes that were  
457 detected 1 ms before a Cspk or 2 ms after, because occasionally they could not be  
458 distinguished from Cspk spikelets.

459 To control for the direct responses to licking we approximated the contribution of the  
460 Cspk response to licking (Figure 3-figure supplement 1D) to the Cspk response to cue. We first  
461 calculated the peri-event time histogram (PETH) of each cell aligned to lick onset without  
462 separating the reward conditions (Figure 3-figure supplement 1C). Then, for every trial, we  
463 created synthetic data in which the firing rate around each lick onset was set to the average  
464 lick triggered PETH. Firing rates during times that were outside the range of the PETH (300 ms)  
465 were treated as missing data. We then averaged these single trial estimations of the firing rate  
466 to calculate the predicted PSTH for each reward condition, aligned to cue presentation. We  
467 performed a similar analysis for lick offset (Figure 3-figure supplement 1D, dashed line) and  
468 saccades (Figure 3-figure supplement 2F).

469 We did not correct for multiple comparisons in our analysis. We either used a small  
470 number of tests over the entire population or a large number of tests on individual cells that  
471 were only used as a criterion (for example, whether a cell differentiated between reward  
472 conditions during the cue). When using a test as a criterion we did not infer the existence of  
473 responsive cells but rather used it as a way to classify cells into subpopulations.

474

475 **References**

- 476 Albus JS. 1971. A theory of cerebellar function. *Math Biosci* **10**:25–61.
- 477 Badura A, Schonewille M, Voges K, Galliano E, Renier N, Gao Z, Witter L, Hoebeek FE,  
478 Chédotal A, DeZeeuw CI. 2013. Climbing fiber input shapes reciprocity of purkinje cell  
479 firing. *Neuron* **78**:700–713.
- 480 Boele H-J, Koekkoek SKE, De Zeeuw CI, Ruigrok TJH. 2013. Axonal sprouting and formation of  
481 terminals in the adult cerebellum during associative motor learning. *J Neurosci*  
482 **33**:17897–907.
- 483 Brown JT, Chan-Palay V, Palay SL. 1977. A study of afferent input to the inferior olivary  
484 complex in the rat by retrograde axonal transport of horseradish peroxidase. *J Comp*  
485 *Neurol* **176**:1–22.
- 486 Carta I, Chen CH, Schott AL, Dorizan S, Khodakhah K. 2019. Cerebellar modulation of the  
487 reward circuitry and social behavior. *Science (80- )* **363**:eaav0581.
- 488 Chabrol FP, Blot A, Mrsic-Flogel TD. 2019. Cerebellar Contribution to Preparatory Activity in  
489 Motor Neocortex. *Neuron*.
- 490 Cromwell HC, Hassani OK, Schultz W. 2005. Relative reward processing in primate striatum.  
491 *Exp Brain Res* **162**:520–525.
- 492 Darlington TR, Beck JM, Lisberger SG. 2018. Neural implementation of Bayesian inference in  
493 a sensorimotor behavior. *Nat Neurosci* **21**:1442–1451.
- 494 Ekerot CF, Kano M. 1985. Long-term depression of parallel fibre synapses following  
495 stimulation of climbing fibres. *Brain Res* **342**:357–360.
- 496 Fallon JH, Schmued LC, Wang C, Miller R, Banales G. 1984. Neurons in the ventral  
497 tegmentum have separate populations projecting to telencephalon and inferior olive,  
498 are histochemically different, and may receive direct visual input. *Brain Res* **321**:332–  
499 336.
- 500 Gao Z, Davis C, Thomas AM, Economo MN, Abrego AM, Svoboda K, De Zeeuw CI, Li N. 2018.  
501 A cortico-cerebellar loop for motor planning. *Nature*.
- 502 Gao Z, Van Beugen BJ, De Zeeuw CI. 2012. Distributed synergistic plasticity and cerebellar  
503 learning.
- 504 Gilbert PFC, Thach WT. 1977. Purkinje cell activity during motor learning. *Brain Res* **128**:309–  
505 328.
- 506 Heffley W, Hull C. 2019. Classical conditioning drives learned reward prediction signals in  
507 climbing fibers across the lateral cerebellum. *bioRxiv* 555508.
- 508 Heffley W, Song EY, Xu Z, Taylor BN, Hughes MA, McKinney A, Joshua M, Hull C. 2018.  
509 Coordinated cerebellar climbing fiber activity signals learned sensorimotor predictions.  
510 *Nat Neurosci* **21**:1431–1441.
- 511 Jörntell H, Ekerot C-F. 2002. Reciprocal Bidirectional Plasticity of Parallel Fiber Receptive  
512 Fields in Cerebellar Purkinje Cells and Their Afferent Interneurons, *Neuron*.
- 513 Joshua M, Lisberger SG. 2012. Reward Action in the Initiation of Smooth Pursuit Eye  
514 Movements. *J Neurosci* **32**:2856–2867.

- 515 Joshua M, Tokiyama S, Lisberger SG. 2015. Interactions between target location and reward  
516 size modulate the rate of microsaccades in monkeys. *J Neurophysiol* **114**:2616.
- 517 Kobayashi Y, Kawano K, Takemura A, Inoue Y, Kitama T, Gomi H, Kawato M. 1998. Temporal  
518 Firing Patterns of Purkinje Cells in the Cerebellar Ventral Paraflocculus During Ocular  
519 Following Responses in Monkeys II. Complex Spikes. *J Neurophysiol* **80**:832–848.
- 520 Kostadinov D, Beau M, Pozo MB, Häusser M. 2019. Predictive and reactive reward signals  
521 conveyed by climbing fiber inputs to cerebellar Purkinje cells. *Nat Neurosci* **22**:950–  
522 962.
- 523 Marr D. 1969. A Theory of Cerebellar Cortex. *J Physiol* 437–470.
- 524 Medina JF, Lisberger SG. 2008. Links from complex spikes to local plasticity and motor  
525 learning in the cerebellum of awake-behaving monkeys. *Nat Neurosci* **11**:1185–1192.
- 526 Nguyen-Vu TDB, Kimpo RR, Rinaldi JM, Kohli A, Zeng H, Deisseroth K, Raymond JL. 2013.  
527 Cerebellar Purkinje cell activity drives motor learning. *Nat Neurosci* **16**:1734–1736.
- 528 Ohmae S, Medina JF. 2015. Climbing fibers encode a temporal-difference prediction error  
529 during cerebellar learning in mice. *Nat Neurosci* **18**:1798–1803.
- 530 Ojakangas CL, Ebner TJ. 1994. Purkinje Cell Complex Spike Activity During Voluntary Motor  
531 Learning: Relationship to Kinematics, *Journal of Neurophysiology*.
- 532 Rashbass C, Westheimer G. 1961. Independence of conjugate and disjunctive eye  
533 movements. *J Physiol* **159**:361–364.
- 534 Rowan MJM, Bonnan A, Zhang K, Amat SB, Kikuchi C, Taniguchi H, Augustine GJ, Christie JM.  
535 2018. Graded Control of Climbing-Fiber-Mediated Plasticity and Learning by Inhibition  
536 in the Cerebellum. *Neuron* **99**:999-1015.e6.
- 537 Schultz W, Dayan P, Montague PR. 1997. A neural substrate of prediction and reward.  
538 *Science (80- )* **275**:1593–1599.
- 539 Stone LS, Lisberger SG. 1990. Visual responses of Purkinje cells in the cerebellar flocculus  
540 during smooth-pursuit eye movements in monkeys. II. Complex spikes. *J Neurophysiol*  
541 **63**:1262–1275.
- 542 Suvrathan A, Payne HL, Correspondence JLR, Raymond JL. 2016. Timing Rules for Synaptic  
543 Plasticity Matched to Behavioral Function. *Neuron* **92**:959–967.
- 544 Thoma P, Bellebaum C, Koch B, Schwarz M, Daum I. 2008. The Cerebellum is Involved in  
545 Reward-based Reversal Learning. *Cerebellum* **7**:433–443.
- 546 Thorndike EL. 1898. Animal intelligence: An experimental study of the associative processes  
547 in animals. *Psychol Rev.*
- 548 Tremblay L, Schultz W. 1999. Relative reward preference in primate orbitofrontal cortex.  
549 *Nature* **398**:704–708.
- 550 Wagner MJ, Kim TH, Savall J, Schnitzer MJ, Luo L. 2017. Cerebellar granule cells encode the  
551 expectation of reward. *Nature* **544**:96–100.
- 552 Warnaar P, Couto J, Negrello M, Junker M, Smilgin A, Ignashchenkova A, Giugliano M, Thier  
553 P, De Schutter E. 2015. Duration of Purkinje cell complex spikes increases with their  
554 firing frequency. *Front Cell Neurosci* **9**:122.

- 555 Welsh JP, Lang EJ, Sugihara I, Llinás R. 1995. Dynamic organization of motor control within  
556 the olivocerebellar system. *Nature* **374**:453–457.
- 557 Zur G, Joshua M. 2019. Using extracellular low frequency signals to improve the spike sorting  
558 of cerebellar complex spikes. *bioRxiv*.
- 559



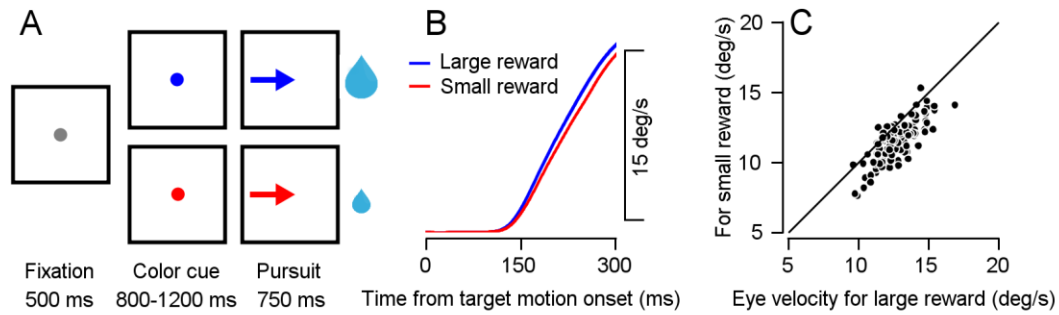

560

561 **Figure 1: Smooth pursuit eye-movement task.** A, Eye movement task temporally separates  
562 reward expectation, pursuit behavior and reward delivery. B, Traces of average eye speed, in  
563 the first 300 ms after target motion onset. Target velocity was 20 °/s. C, Each dot represents  
564 the average speed for an individual session 250 ms after target movement onset for the large  
565 (horizontal) and small (vertical) reward cue (Signed-rank,  $P=2 \cdot 10^{-18}$ ,  $n=115$ ).

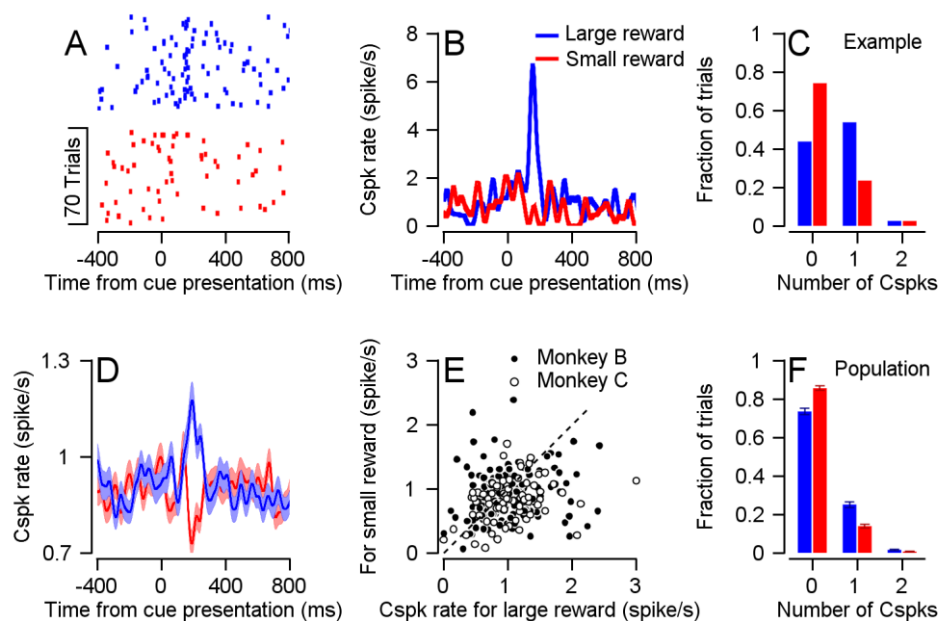

566

567 **Figure 2: Cspk rate differentiates reward conditions during cue presentation.** A, Raster plot  
568 of an example cell in the two reward conditions, aligned to cue presentation. B, PSTH of the  
569 cell in A. C, Histogram of the number of Cspks that occurred in the 100-300 ms time window  
570 following cue presentation, in the same example cell. D, Population PSTH. In all figures the  
571 error bars represent SEM. E, Each dot represents the average Cspk rate of an individual cell  
572 100-300 ms after the display of the large (horizontal) and small (vertical) reward cue (Signed-  
573 rank, Monkey B:  $P=0.01$ ,  $n=148$ , Monkey C:  $P=3.35 \cdot 10^{-4}$ ,  $n=72$ ). F, Histogram of the number  
574 of Cspks that occurred in the 100-300 ms time window following cue presentation, in the  
575 entire population (fraction of trials with 1 Cspks: Signrank,  $P=5.1 \cdot 10^{-4}$ ,  $n=40$ ; fraction of trials  
576 with two Cspks: ,  $P=0.03$ ,  $n=40$ ).

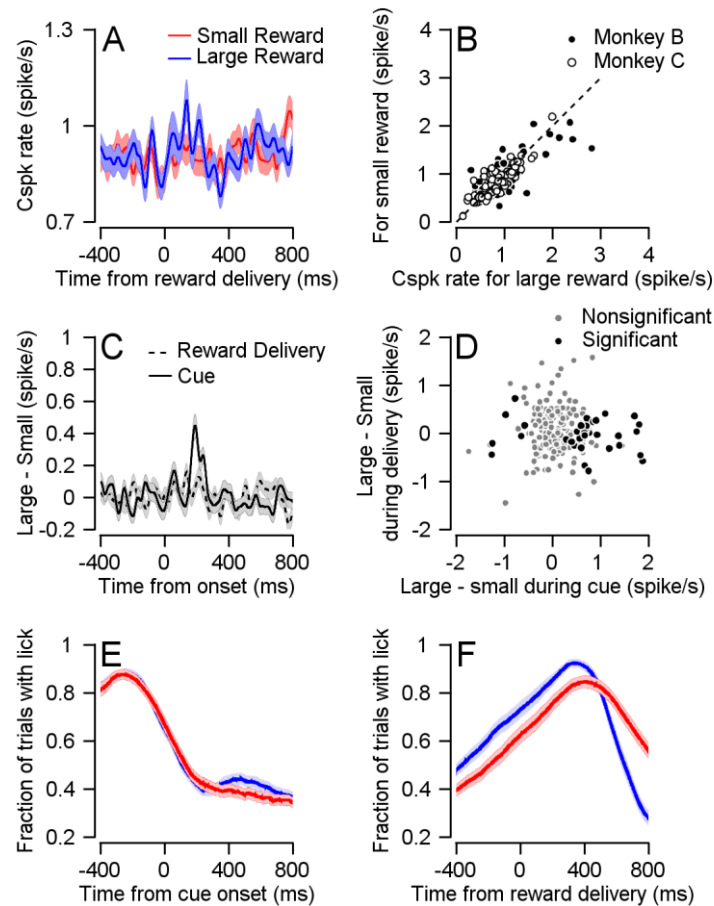

577

578 **Figure 3: Cspk is not modulated by reward size during reward delivery.** A, Population PSTHs  
579 for different reward conditions aligned to reward delivery. B, Each dot represents the average  
580 Cspk rate of an individual cell 100-300 ms large (horizontal) and small (vertical) reward  
581 delivery (Signed-rank, Monkey B:  $P=0.339$ ,  $n=148$ ; Monkey C:  $P=0.719$ ,  $n=72$ ). C, The  
582 differences between the PSTH for large and small rewards aligned to cue or to reward delivery.  
583 D, Each dot represents the average Cspk rate of an individual cell 100-300 ms after the cue  
584 (horizontal) and reward delivery (vertical; Spearman correlation of all cells:  $r=-0.069$ ,  $P=0.304$ ,  
585  $n=220$ ; Spearman correlation of cells that responded to reward size during cue:  $r=-0.056$ ,  
586  $P=.727$ ,  $n=40$ ). E and F, Fraction of trials with licks, during cue and reward delivery.

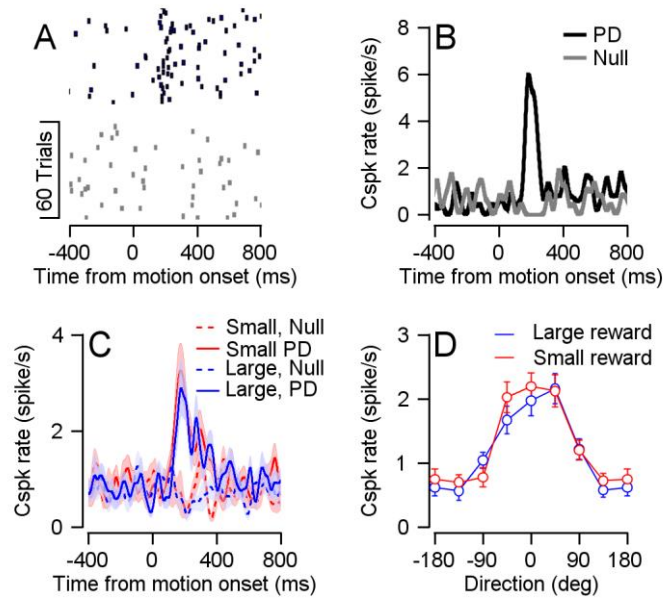

587

588 **Figure 4: Reward did not modulate Cspk direction tuning.** A, Raster plot of an example cell  
589 in its preferred (black) and null (gray) directions, aligned to target movement onset. B, PSTH  
590 of the cell in A. C, Population PSTH for different reward conditions, in the preferred (solid)  
591 and null (dashed) directions. D, Population direction tuning curve (Permutation test:  
592  $P=0.2156$ ,  $n=33$ ).

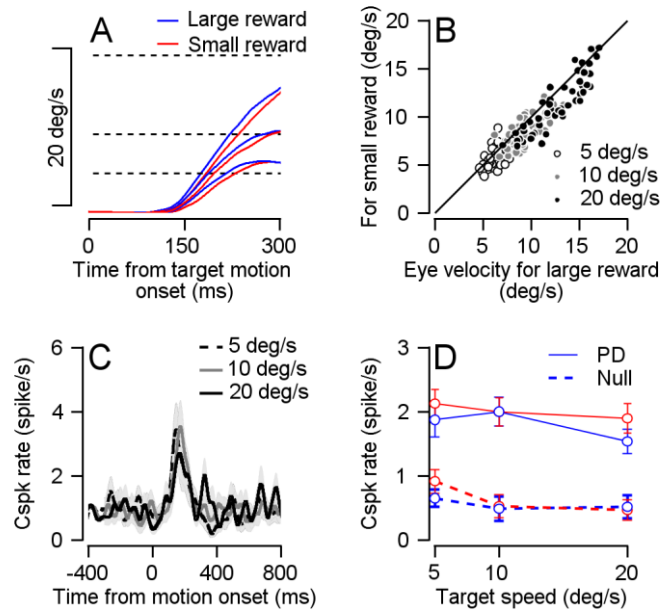

593

594 **Figure 5: Cspk rate was not modulated by reward size at target motion onset in the speed**  
595 **tuning task. A, Average eye velocity traces for experiments in which the color cue signaled a**  
596 **large (blue) or small (red) reward and the target speed was 5°/s, 10°/s and 20°/s. Slower traces**  
597 **correspond to slower target speeds. Dotted lines represent target velocity. B, Individual**  
598 **session average eye velocity 250 ms after target movement onset for large (horizontal) and**  
599 **small (vertical) reward, in the different target velocity conditions (Signed-rank:  $P=6 \cdot 10^{-16}$ ,**  
600  **$n=56$ ).** C, population PSTHs of cells in their PD for the different speed conditions. D, Population  
601 speed tuning curve in the PD (solid) and null (dashed) directions (Permutation test:  $P=0.4541$ ,  
602  $n=16$ ).

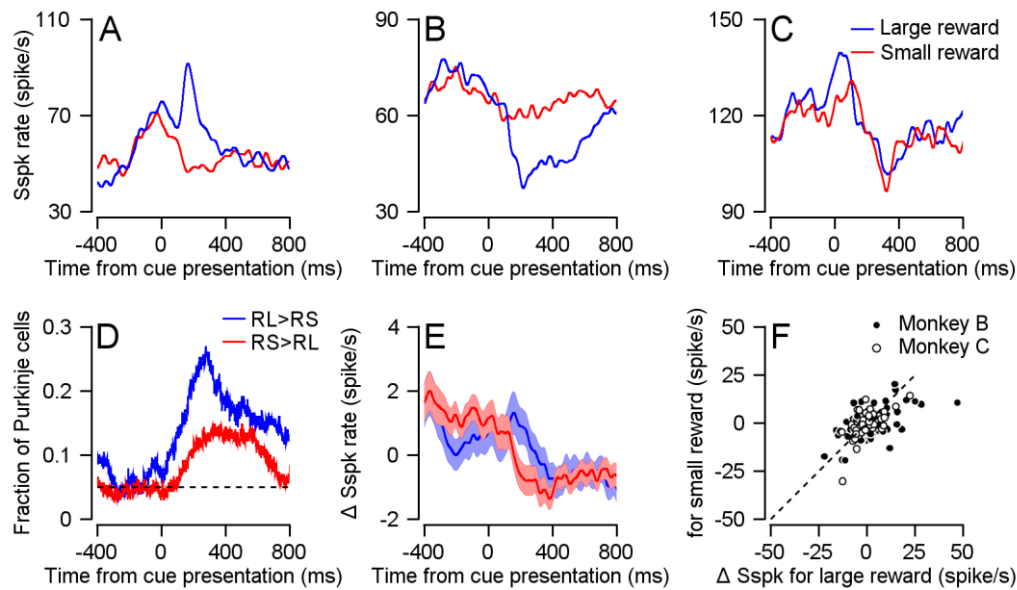

603

604 **Figure 6: Sspk modulations following cue presentation.** A-C, Examples of cells' Sspks  
605 responses to cue presentation in each reward condition. D, Fraction of cells with a higher Sspk  
606 rate in the large reward condition (blue) or small reward condition (red) as a function of time.  
607 The dashed line represents the 0.05 false positive chance level. E, Population PSTH, the  
608 average Sspk rate of each cell was subtracted. F, Each dot represents the average Sspk rate of  
609 an individual cell 100-300 ms large (horizontal) and small (vertical) reward delivery (Signed-  
610 rank, Monkey B:  $P=0.142$ ,  $n=155$ ; Monkey C:  $P=0.09$ ,  $n=75$ ).

611

612

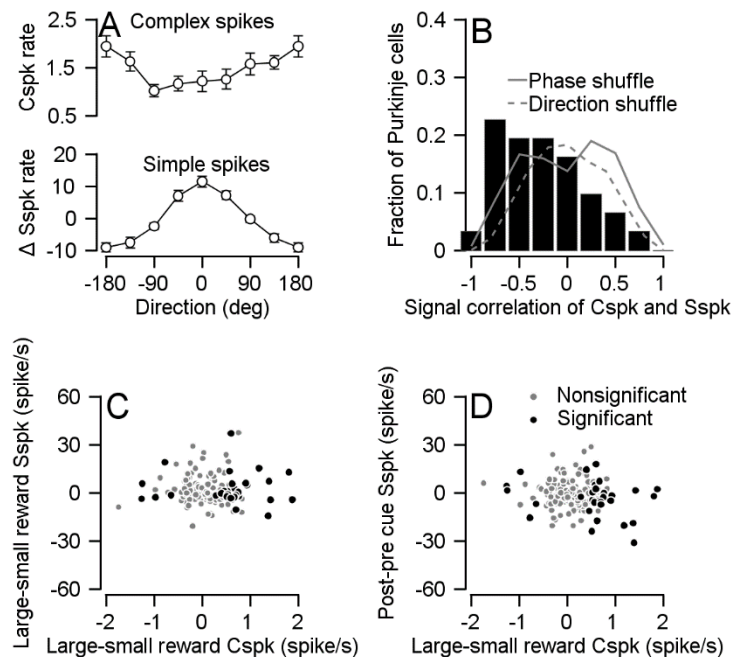

613

614 **Figure 7: Cspk rate negatively correlated with Sspk rate during movement but not during**  
615 **cue presentation. A,** Population tuning curve of Cspks (up) and Sspks (bottom), both aligned  
616 to the preferred direction of Sspks (Spearman  $r=-0.3087$ ,  $P=7*10^{-7}$ ,  $n=31$ ). **B,** Histogram of  
617 signal correlations of simple and complex spikes in the population. Solid and dashed lines  
618 show the correlations for phased and direction shuffled data (Signed-rank:  $P= 0.002$ ,  $n=31$ ).  
619 **C,** Each dot shows individual cell differences in average rate between reward conditions 100-  
620 300 ms after cue, in Cspks (horizontal) and Sspks (vertical; Spearman correlation of all cells  $r=-$   
621  $0.07$ ,  $P=0.32$ ,  $n=172$ ; Spearman correlation of cells that responded to reward size during cue:  
622  $r=-0.003$ ,  $P=0.98$ ,  $n=30$ ) **D,** Similar to **C**, the horizontal position of each dot shows individual  
623 cell differences in average Cspk rate between reward conditions 100-300 ms after cue. The  
624 vertical axis shows the difference in Sspk firing rate in the time window 100-300 ms after the  
625 cue and 100-300 ms before the cue (vertical; Spearman correlation of all cells  $r=-0.03$ ,  $P=0.63$ ,  
626  $n=172$ ; Spearman correlation of cells that responded to reward size during cue:  $r=-0.19$ ,  
627  $P=0.31$ ,  $n=30$ ).

628

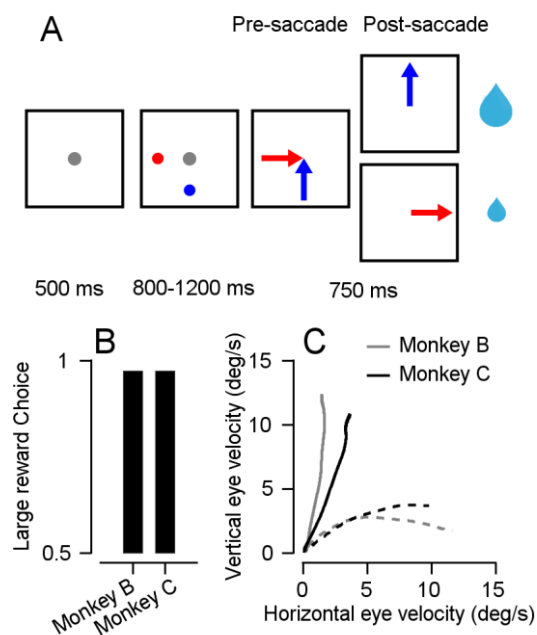

**Figure 1-figure supplement 1: Monkeys associate reward size with target color.** **A**, Schematics of the target selection task (Joshua and Lisberger, 2012). The dots represent the different targets and the arrows represent the target motion direction. The size of the reward was determined by the target selected by the monkey. **B**, Fraction of trials in which the monkey selected the large reward target. Bars show the averages across sessions. SEMs were smaller than the line width and therefore cannot be presented. **C**, Eye velocity in the vertical versus horizontal direction during the first 300 ms after motion onset of the targets. Time begins with eye velocity at the origin, as time progresses toward 300 ms, eye velocity moves outward along each trace in the graph. Solid traces show trials in which the large reward target moved vertically, and dashed traces show trials in which the large reward target moved horizontally. The adjacency of the traces to the axes indicates the bias in pursuit towards the large reward target (Joshua and Lisberger, 2012). Gray and black traces show the averages for monkey B and C.



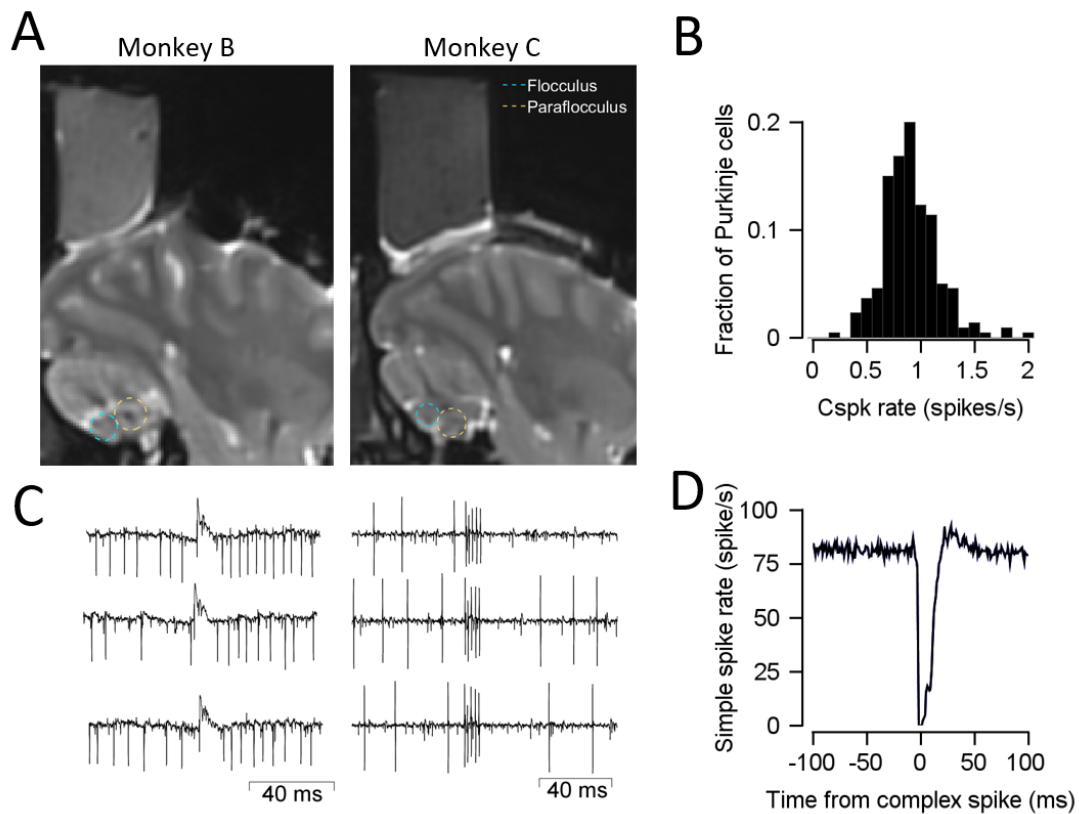

**Figure 1-figure supplement 2: MRI and examples of extracellular recordings of Cspks.** **A**, MRI of the sagittal section 11mm lateral to the midline. Chambers were placed above the floccular complex and neighboring areas. The cyan ellipses represent the approximate location of the Flocculus and the yellow ellipses the approximate location of the Paraflocculus. **B**, Histogram of the average firing rate of cells. The histogram is centered around 1Hz with is typical for Cspks. **C**, Example of extracellular recordings of Cspks from two neurons. Each column shows Cspks from the same neuron. **D**, The cross-correlation of simple spikes to complex spikes, which is essentially a PSTH of Sspks aligned to the event of a Cspk occurrence. The prolonged decrease in Sspk rate following a Cspk is consistent with the literature (Schonewille et al., 2006; Yang and Lisberger, 2014).

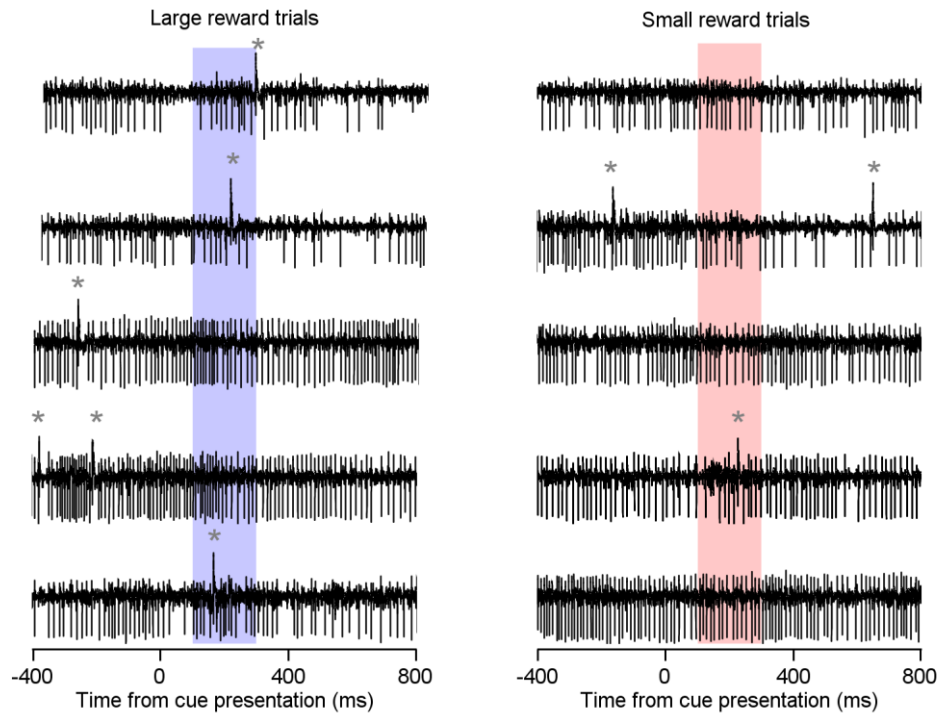

**Figure 2-figure supplement 1: Fraction of trials with Cspks following the cue presentation is higher in the large reward condition than in the small reward condition.** Examples of raw data traces of individual trials for the example cell in Figure 2A in the large (right) and small (left) reward conditions. The grey asterisks mark a Cspk and the colored rectangle marks the 100-300 ms time bin following the cue. Trials with more than a single spike in the analysis window were very rare.

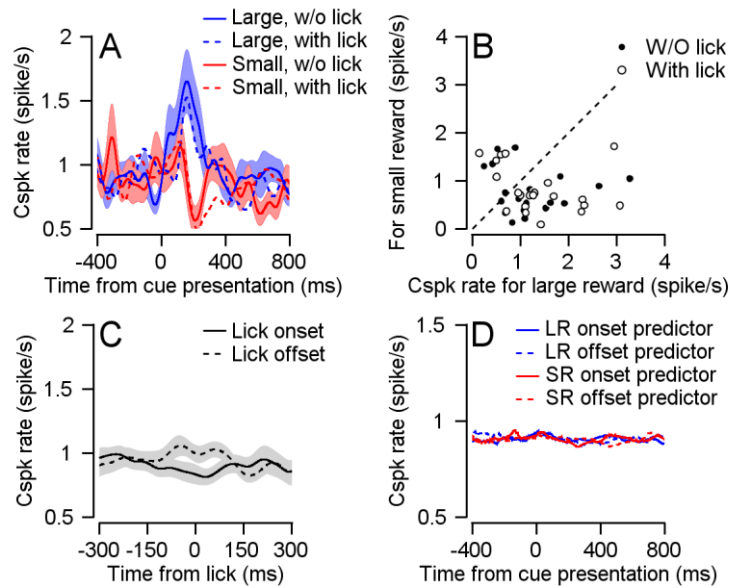

**Figure 3-figure supplement 1: Licking behavior does not underpin the Cspk rate difference during cue.** **A**, Dashed and solid traces show large (blue) and small (red) reward trials with and without a lick initiation in the first 500 ms after the onset of the cue. **B**, Each dot represents the average Cspk rate of an individual cell 100-300 ms large (horizontal) and small (vertical) reward delivery. Filled dots show the averages for trials with a lick and empty dots without a lick (Signed-rank, with lick:  $P=0.068$ ,  $n=21$ ; without lick:  $P=0.04$ ,  $n=21$ ). **C**, PSTE aligned to either the onset of a lick (solid) or the offset of a lick (dashed). **D**, Predicted PSTH based on the timing of lick onset and offset, and the PSTEs in **C** for large and small rewards (see Methods).

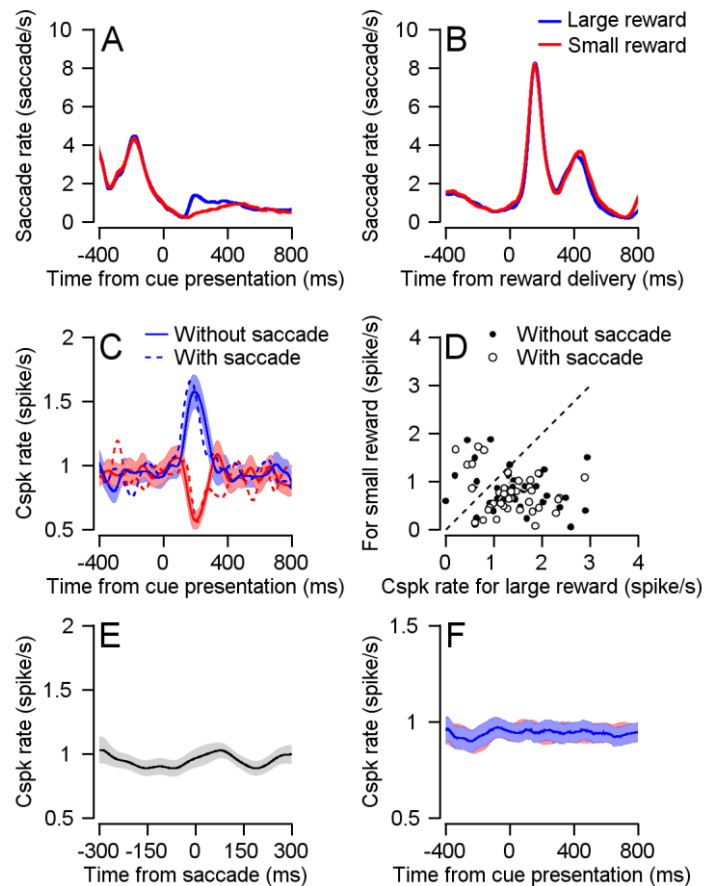

**Figure 3-figure supplement 2: Saccades and microsaccades do not underpin the Cspk rate difference during cue.** **A** and **B**, The saccade rate as a function of time from the cue onset (**A**) and reward delivery (**B**) for trials with large (blue) and small (red) rewards. After cue onset, the monkeys made more fixational saccades in the large reward condition (Joshua et al., 2015). The large increase after reward delivery is a result of the monkeys' saccade back to the center of the screen from the eccentric position of the eye. **C**, Large and small reward trials with (dashed) and without (solid) saccades in the first 500 ms after the onset of the cue. **D**, Each dot represents the average Cspk rate of an individual cell 100-300 ms large (horizontal) and small (vertical) reward delivery. Filled dots show the averages for trials with a saccade and empty dots without a saccade (Signed-rank, with saccade:  $P=3.4 \times 10^{-4}$ ,  $n=40$ ; without lick:  $P=3.15 \times 10^{-4}$ ,  $n=40$ ). **E**, PSTH aligned to the occurrence of a saccade. **D**, Predicted PSTH based on the timing of saccades, and the PSTH in **E** for large and small rewards (see Methods).

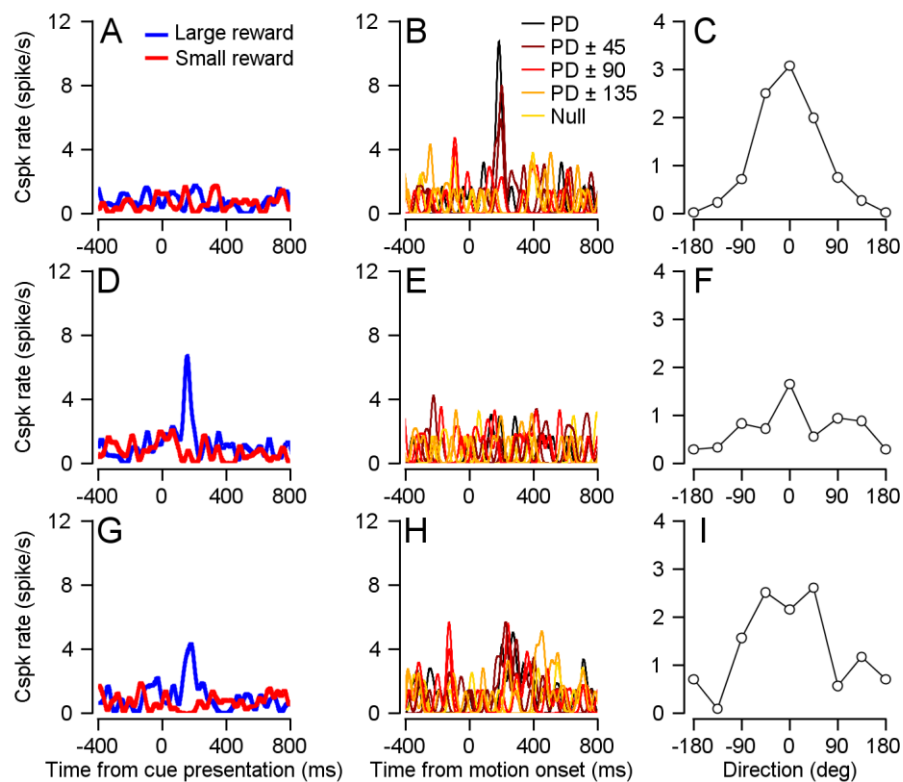

**Figure 4-figure supplement 1: Examples of cells Cspk responses to cue and target movement.** **A, D** and **G**: PSTH following cue presentation. **B, E** and **F**: PSTH following target movement onset in the different directions relative to the preferred direction of the cell. **C, F** and **I**: Tuning curve 100-300 ms after target motion onset aligned to the PD of the cell. **A-C**, Responses of the example cell in Figure 4. **D-F**, Responses of the cell in Figure 2. **G-I**, An additional cell.

### **Supplementary References:**

- Joshua M, Lisberger SG. 2012. Reward Action in the Initiation of Smooth Pursuit Eye Movements. *J Neurosci* **32**:2856–2867.
- Joshua M, Tokiyama S, Lisberger SG. 2015. Interactions between target location and reward size modulate the rate of microsaccades in monkeys. *J Neurophysiol* **114**:2616.
- Schonewille M, Khosrovani S, Winkelman BHJ, Hoebeek FE, De Jeu MTG, Larsen IM, Van Der Burg J, Schmolesky MT, Frens MA, De Zeeuw CI. 2006. Purkinje cells in awake behaving animals operate at the upstate membrane potential. *Nat Neurosci* **9**:459–461.
- Yang Y, Lisberger SG. 2014. Purkinje-cell plasticity and cerebellar motor learning are graded by complex-spike duration. *Nature* **510**:529–532.
